# Supplementary material
Source: MDPI journal article supplement (https://www.mdpi.com/2073-4344/13/5/827)
Supplement: s1 [file s1]

## Supplementary Material

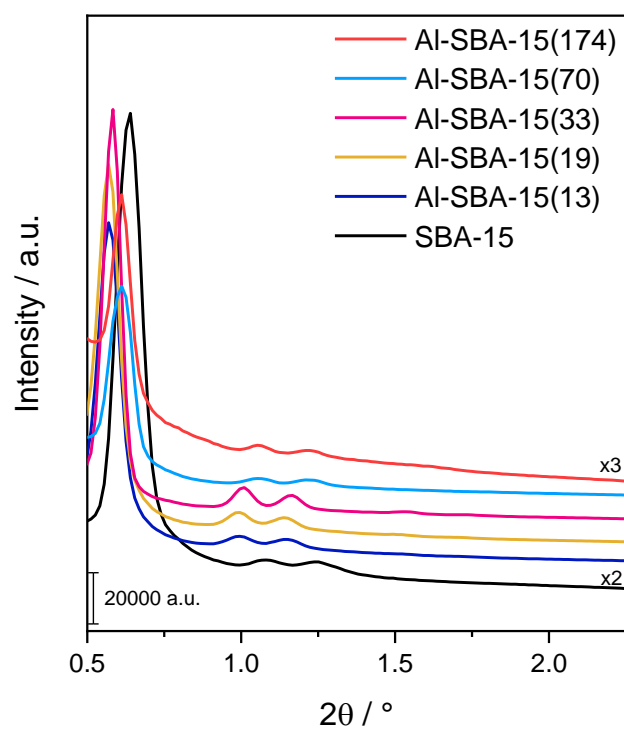

**Figure S1.** SA-XRD diffractograms of the synthesized mesoporous SBA-15, Al-SBA-15(13), Al-SBA-15(19), Al-SBA-15(33), Al-SBA-15(70) and Al-SBA-15(174).

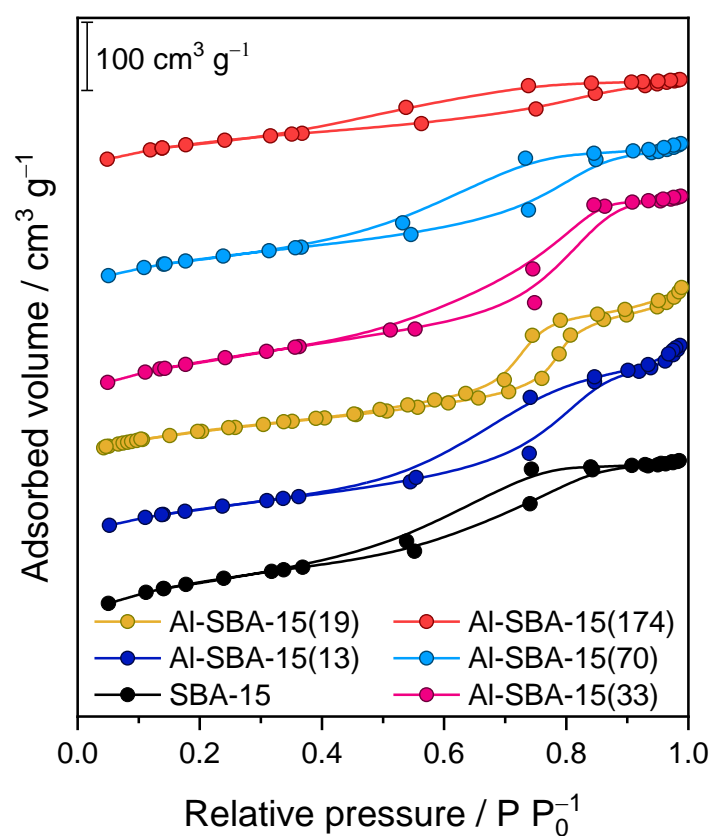

**Figure S2.** N<sub>2</sub> adsorption-desorption isotherms of the synthesized mesoporous SBA-15, Al-SBA-15(13), Al-SBA-15(19), Al-SBA-15(33), Al-SBA-15(70) and Al-SBA-15(174).

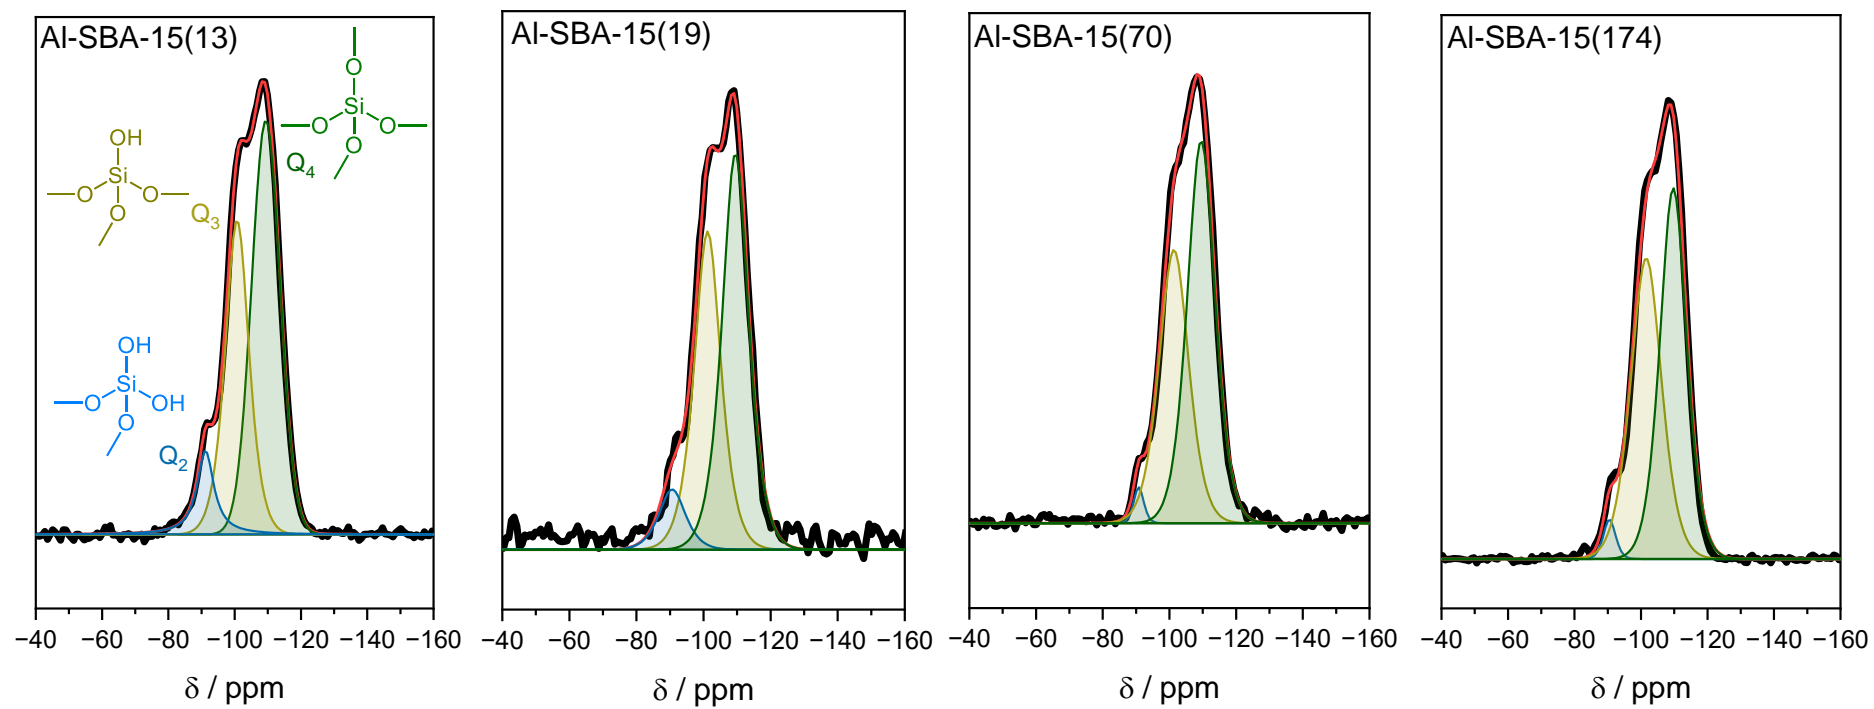

**Figure S3.**  $^{29}\text{Si}$  CP/MAS NMR spectra of Al-SBA-15(13), Al-SBA-15(19), Al-SBA-15(70), Al-SBA-15(174).

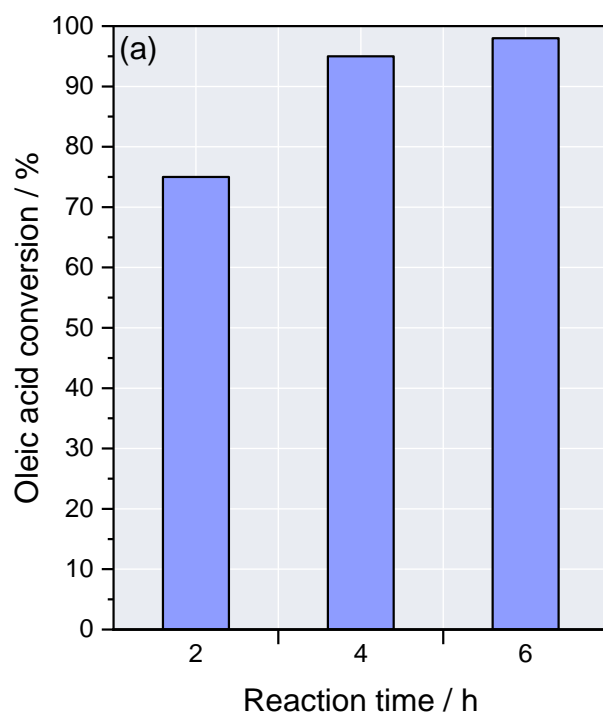

**Figure S4.** Oleic acid esterification over Al-SBA-15(19) at different reaction time. Reaction conditions: T = 150 °C, P = 20 bar (N<sub>2</sub>), methanol:oleic acid 30:1 and 10% of catalyst.

**Table S1.** Comparison of reaction conditions and catalyst performance for different silicate-based catalysts in the esterification of fatty acids.

| Catalyst                      | Si/M | Fatty Acid    | Alcohol     | T (°C) | Cat weight (%) | Alcohol:Fatty acid | Time (h) | X (%) | Reference    |
|-------------------------------|------|---------------|-------------|--------|----------------|--------------------|----------|-------|--------------|
| Sn-SBA-15                     | 304  | Oleic acid    | Methanol    | 80     | 5              | 15:1               | 1        | 4.2   | [12]         |
| Sn-SBA-15-PrSO <sub>3</sub> H | 304  | Oleic acid    | Methanol    | 80     | 5              | 15:1               | 1        | 56.5  | [12]         |
| Al-MCM-41                     | 8    | Palmitic acid | Methanol    | 130    | 0.6            | 60:1               | 2        | 79    | [19]         |
| Al-MCM-41                     | 16   | Palmitic acid | Ethanol     | 130    | 0.6            | 60:1               | 2        | 67    | [19]         |
| Al-MCM-41                     | 32   | Palmitic acid | Isopropanol | 130    | 0.6            | 60:1               | 2        | 59    | [19]         |
| Al-SBA-15                     | 25   | Lauric acid   | Methanol    | 70     | 5              | n.i.               | 2        | 85    | [20]         |
| Al-SBA-15                     | 37.5 | Lauric acid   | Methanol    | 70     | 5              | n.i.               | 2        | 79    | [20]         |
| Al-SBA-15                     | 50   | Lauric acid   | Methanol    | 70     | 5              | n.i.               | 2        | 76    | [20]         |
| Al-MCM-41                     | 13.6 | Lauric acid   | Methanol    | 65     | 2              | n.i.               | 1        | 60    | [21]         |
| Al-MCM-41                     | 13.6 | Lauric acid   | Methanol    | 65     | 5              | n.i.               | 1        | 75    | [21]         |
| Al-MCM-41                     | 13.6 | Lauric acid   | Methanol    | 65     | 7              | n.i.               | 1        | 82    | [21]         |
| SBA-15-SO <sub>3</sub> H      | -    | Oleic acid    | Methanol    | 140    | 5              | 15:1               | 2        | 97    | [22]         |
| Al-SBA-15                     | 33   | Oleic acid    | Methanol    | 140    | 5              | 15:1               | 2        | 33    | [22]         |
| Al-SBA-15-SO <sub>3</sub> H   | 69   | Oleic acid    | Methanol    | 140    | 5              | 15:1               | 2        | 80    | [22]         |
| Ti-SBA-15                     | 51   | Oleic acid    | Methanol    | 140    | 5              | 15:1               | 2        | 34    | [22]         |
| Ti-SBA-15-SO <sub>3</sub> H   | 48   | Oleic acid    | Methanol    | 140    | 5              | 15:1               | 2        | 96    | [22]         |
| Al-SBA-15                     | 13   | Oleic acid    | Methanol    | 150    | 10             | 30:1               | 2        | 70    | Present work |
| Al-SBA-15                     | 19   | Oleic acid    | Methanol    | 150    | 10             | 30:1               | 2        | 75    | Present work |
| Al-SBA-15                     | 33   | Oleic acid    | Methanol    | 150    | 10             | 30:1               | 2        | 86    | Present work |
| Al-SBA-15                     | 70   | Oleic acid    | Methanol    | 150    | 10             | 30:1               | 2        | 93    | Present work |
| Al-SBA-15                     | 174  | Oleic acid    | Methanol    | 150    | 10             | 30:1               | 2        | 82    | Present work |
| Al-SBA-15                     | 19   | Linoleic acid | Methanol    | 150    | 10             | 30:1               | 2        | 67    | Present work |
| Al-SBA-15                     | 19   | Stearic acid  | Methanol    | 150    | 10             | 30:1               | 2        | 64    | Present work |

n.i. – not informed
